# Supplementary material
Source: PubMed Central journal article supplement (PMC3894492)

Supplementary Appendix to “Novel risk factors for disease progression following detection of monoclonal gammopathy of uncertain significance”

| <b>Table Of Contents</b>                                                  | <b>Page</b> |
|---------------------------------------------------------------------------|-------------|
| Table S1. Exclusion criteria for study sample                             | 1           |
| Table S2. Distribution and event totals by each risk category             | 2           |
| Figure S1. Cumulative risk of lymphoid progression by age                 | 3           |
| Figure S2. Receiver operating characteristic curves of progression models | 4           |

Table S1. Exclusion Criteria For Study Sample

| Description                                                  | Number |
|--------------------------------------------------------------|--------|
| Initial number of Malmo patients with free light chain assay | 797    |
| <i>Exclusions</i>                                            |        |
| Smoldering Multiple Myeloma                                  | 18     |
| Missing birthdate or date of MGUS diagnosis.                 | 35     |
| Unknown M-protein subtype.                                   | 8      |
| Hematologic event before M-component detection               | 8      |
| Myeloma                                                      | 3      |
| AML                                                          | 2      |
| MPD                                                          | 3      |
| Study Sample                                                 | 728    |

Table S2. Distribution and event totals by each risk category for Mayo 3 and immunoparesis<sup>a</sup> count totals

|                                       | Number<br>(Percent) | Number of Events |         |
|---------------------------------------|---------------------|------------------|---------|
|                                       |                     | Lymphoid         | Myeloid |
| <b>Mayo 3 count</b>                   |                     |                  |         |
| 0                                     | 255 (35.0)          | 17               | 5       |
| 1                                     | 310 (42.6)          | 32               | 4       |
| 2                                     | 142 (19.5)          | 27               | 1       |
| 3                                     | 21 (2.9)            | 8                | 0       |
| <b>Immunoparesis and Mayo 3 count</b> |                     |                  |         |
| 0                                     | 224 (30.8)          | 12               | 4       |
| 1                                     | 273 (37.5)          | 27               | 4       |
| 2                                     | 147 (20.2)          | 21               | 2       |
| 3                                     | 74 (10.2)           | 18               | 0       |
| 4                                     | 10 (1.4)            | 6                | 0       |

a Subtype IgG: IgA <0.88 g/L or IgM<0.27 g/L; Subtype IgA: IgM<0.27 g/L or IgG <6.7 g/L; Subtype IgM: IgA <0.88 g/L or IgG <6.7 g/L

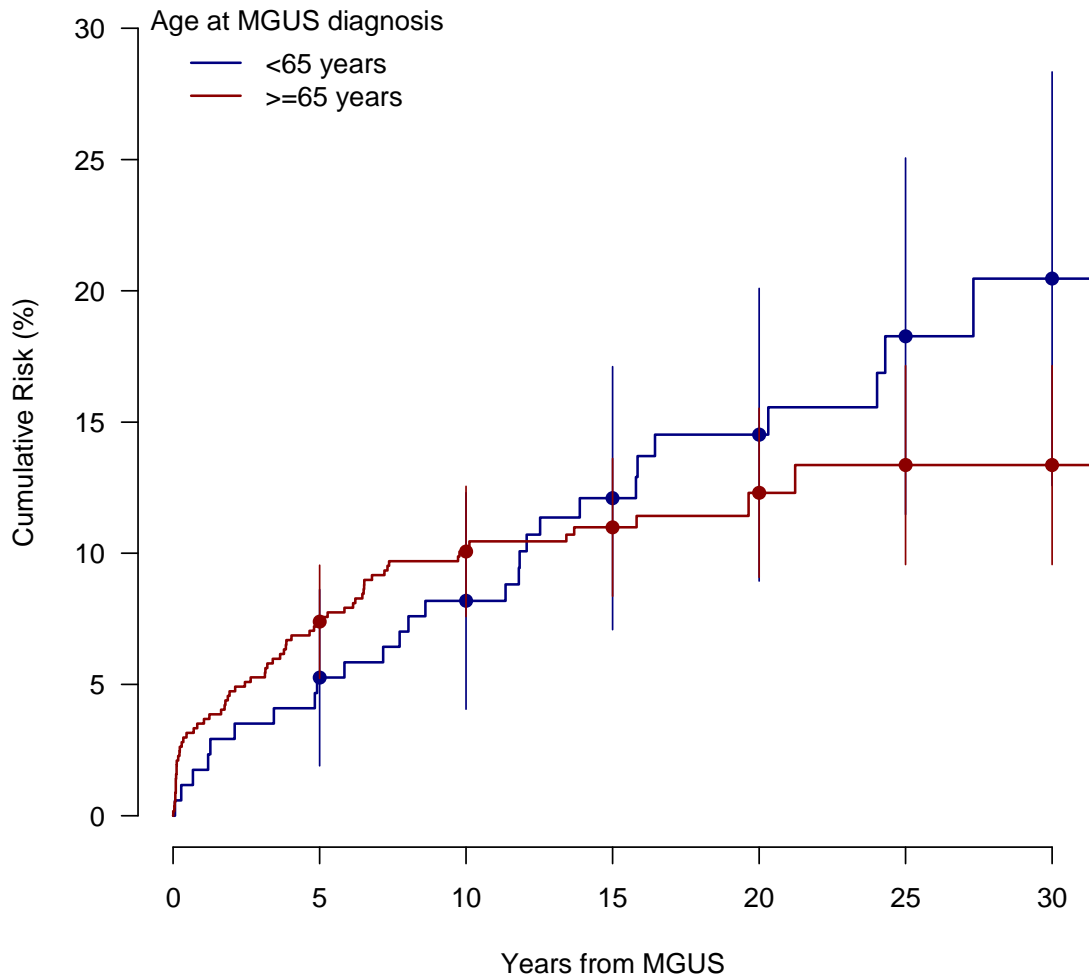

| Age  |           | 0          | 5           | 10          | 15          | 20           | 25           | 30 |
|------|-----------|------------|-------------|-------------|-------------|--------------|--------------|----|
| <65  | N at risk | 142        | 116         | 77          | 51          | 28           | 10           |    |
|      | Risk %    | 4.8        | 7.7         | 11.7        | 14.1        | 18.0         | 20.3         |    |
|      | (95% CI)  | (1.5, 8.0) | (3.7, 11.8) | (6.7, 16.7) | (8.6, 19.7) | (11.1, 24.8) | (12.3, 28.3) |    |
| >=65 | N at risk | 353        | 256         | 115         | 30          | 12           | 6            |    |
|      | Risk %    | 6.5        | 9.2         | 10.2        | 11.5        | 12.6         | 12.6         |    |
|      | (95% CI)  | (4.4, 8.5) | (6.8, 11.6) | (7.6, 12.7) | (8.3, 14.7) | (8.8, 16.3)  | (8.8, 16.3)  |    |

**Figure S1.** Cumulative risk of a lymphoid event in years from MGUS diagnosis stratified by age at diagnosis. Bars denote the 95% confidence interval.

**Figure S2 A**

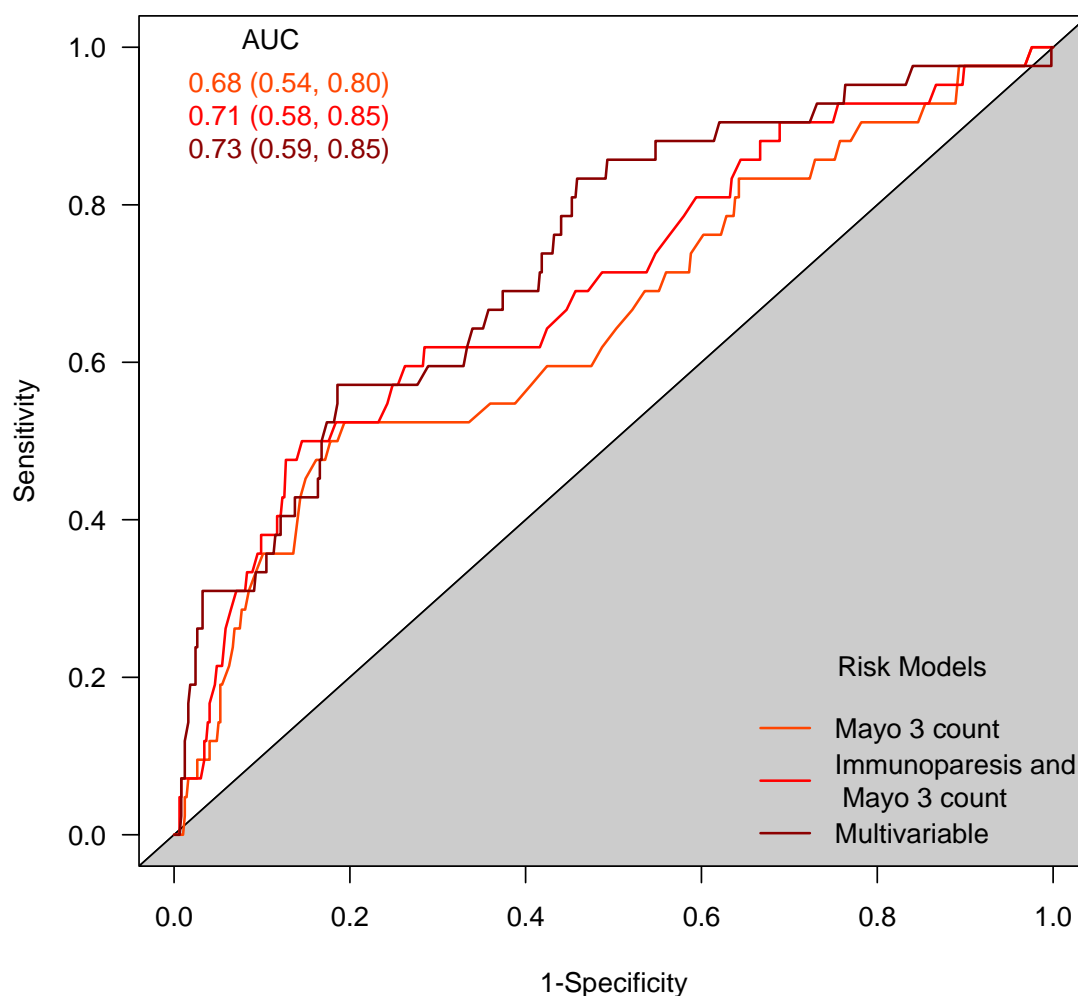

**Figure S2.** Receiver operating characteristic curve for three progression risk models for progression to a lymphoproliferative event following MGUS diagnosis. Curves correspond to the sensitivity and specificity of the models when fit to the full study cohort. The area under the curve (AUC) statistics were determined from a three-fold cross-validation with 150 Monte Carlo samples. **Figure S2 A** shows the comparative discriminatory ability for risk models of progression to any lymphoid event. **Figure S2 B** shows the comparative discriminatory ability for risk models of progression to multiple myeloma.

Figure S2 B

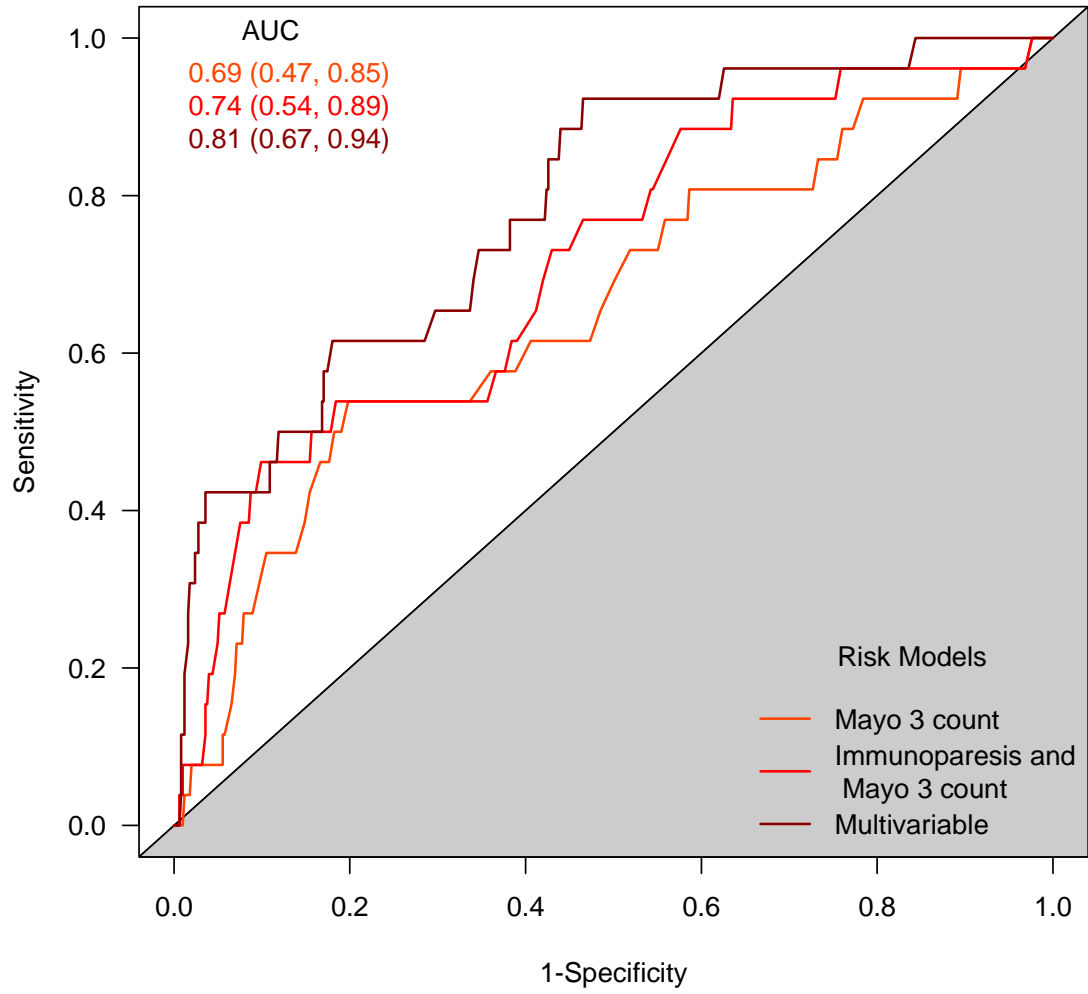

Supplement: supp_blood-2013-05-505487_blood-2013-05-505487-1.pdf [file supp_blood-2013-05-505487_blood-2013-05-505487-1.pdf]
